# Supplementary material
Source: PubMed Central journal article supplement (PMC3752241)
Supplement: 1312793110_pnas.201312793SI.pdf [file 1312793110_pnas.201312793SI.pdf]

# Supporting Information

Boyd et al. 10.1073/pnas.1312793110

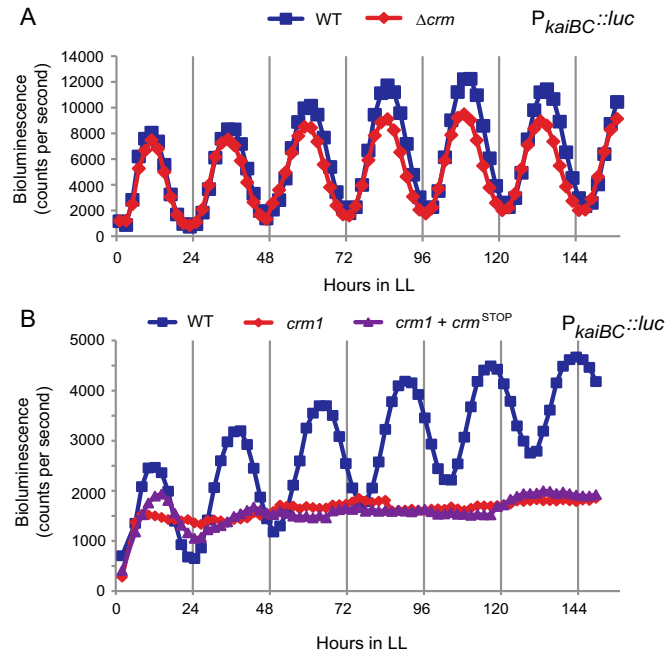

**Fig. S1.** (A) Average bioluminescence traces of wild type (WT) (blue trace) and *crm* deletion mutant (red trace) measured from *kaiBC::luc* reporter. Segregation of the mutant was confirmed via PCR. No substantial differences in gene expression rhythms were detected. (B) Start codon of *crm* ORF is required for complementation of arrhythmia of the *crm1* insertion strain. Representative bioluminescence traces of WT (blue), *crm1* (red), and *crm1* transformed with a construct wherein the start codon of *crm* is substituted with two consecutive TAG stop codons (violet) are shown. None of the 12 independent *crm* start→stop strains tested demonstrated complementation of arrhythmia. LL, constant light.

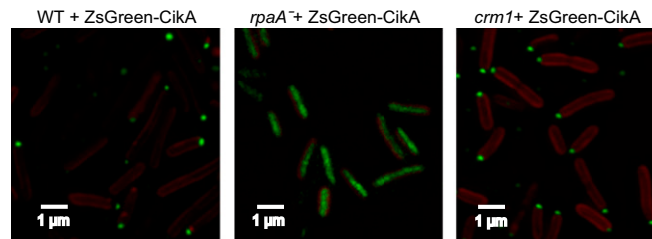

**Fig. S2.** Combined fluorescence micrographs of WT, *rpaA*<sup>-</sup>, and *crm1* strains expressing ZsGreen-tagged CikA (green). Autofluorescence from photosynthetic pigments is in red. Disruption of *rpaA* abolishes the polar localization of CikA, whereas CikA localization is not disrupted in *crm1* cells.

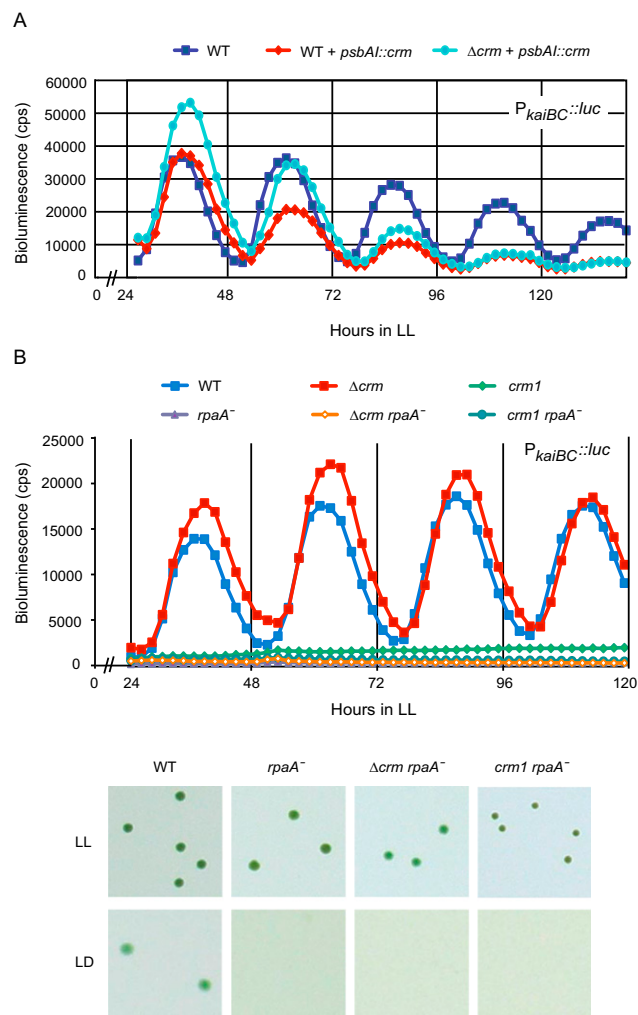

**Fig. S3.** (A) Expression of native *crm* from the strong *psbAI* promoter results in significant damping of amplitude of rhythms in both WT and *crm* deletion backgrounds after several days in free run after 2 d of entrainment to a 12-h light:dark (LD) cycle. Average bioluminescence traces are shown. (B) Genetic disruption of *rpaA* in either a *crm1* or a *crm* deletion background reflects phenotypes of an *rpaA* null. (Upper) Representative bioluminescence traces of *kaiBC::luc* promoter activity. (Lower) Colony growth in LL vs. LD.

**Table S1. RNA transcript expression in the *crm* genomic region**

| Oligonucleotide primer set   | Position relative to Tn5 insertion | Average cycle threshold |             |
|------------------------------|------------------------------------|-------------------------|-------------|
|                              |                                    | WT                      | <i>crm1</i> |
| F1/R3                        | Downstream                         |                         |             |
| Forward: GCTATCTCAACAGCAGTTC |                                    | 19                      | 19          |
| Reverse: CGTCATAGCCAGACATCTC |                                    |                         |             |
| F4/R4                        | Upstream                           |                         |             |
| Forward: CCTCAAGGCAGCCTAGA   |                                    | 20                      | 19          |
| Reverse: CTGAGCCTTGATCAACTCA |                                    |                         |             |
| Control                      | <i>rpoA</i>                        | 16                      | 16          |

**Table S2. Cyanobacterial strains used in this study**

| Strain  | Genetic characteristics*                              | Antibiotic resistance | Source or reference            |
|---------|-------------------------------------------------------|-----------------------|--------------------------------|
| AMC06   | WT                                                    | none                  | Laboratory collection          |
| AMC541  | WT P <sub>kaiBC</sub> :: <i>luc</i>                   | Cm                    | Ditty et al. 2003 <sup>1</sup> |
| AMC601  | WT P <sub>purF</sub> :: <i>luc</i>                    | Km                    | Ditty et al. 2005 <sup>2</sup> |
| AMC603  | WT P <sub>psbAI</sub> :: <i>luc</i>                   | Km                    | Ditty et al. 2005 <sup>2</sup> |
| AMC704  | <i>kaiC</i> in-frame deletion                         | Cm                    | Ditty et al. 2005 <sup>2</sup> |
| AMC1722 | Tn5 8S15-E11 in AMC541                                | Km, Cm                | Dong et al. 2010 <sup>3</sup>  |
| AMC2051 | uni-gene set (UGS) 18-B-10<br>(Tn5 8S15-E11 in AMC06) | Km                    | This study                     |
| AMC1782 | pAM4420 in AMC06                                      | Km                    | Takai et al. 2006 <sup>4</sup> |
| AMC2082 | pAM4226 in AMC1782                                    | Km, Sp, Sm            | This study                     |
| AMC2034 | pAM4664 in AMC541                                     | Km, Cm, Sp, Sm        | This study                     |
| AMC2039 | pAM4420 in AMC541                                     | Km, Cm                | This study                     |
| AMC2087 | pAM2225 in AMC2051                                    | Km, Sp, Sm            | This study                     |
| AMC2086 | pAM2224 in AMC2051                                    | Km, Sp, Sm            | This study                     |
| AMC2140 | Tn5 8S15-E11 in AMC704                                | Km, Cm                | This study                     |

\*pAM plasmids were used to transform cyanobacterial strains (AMC) by homologous recombination.  
Cm, chloramphenicol; Km, kanamycin; Sm, streptomycin; Sp, spectinomycin.

- Ditty JL, Williams SB, Golden SS (2003) A cyanobacterial circadian timing mechanism. *Annu Rev Genet* 37:513–543.
- Ditty JL, et al. (2005) Stability of the *Synechococcus elongatus* PCC 7942 circadian clock under directed anti-phase expression of the *kai* genes. *Microbiol* 151:2605–2613.
- Dong G, et al. (2010) Elevated ATPase activity of KaiC applies a circadian checkpoint on cell division in *Synechococcus elongatus*. *Cell* 140(4):529–539.
- Takai N, et al. (2006) A KaiC-associating SasA-RpaA two-component regulatory system as a major circadian timing mediator in cyanobacteria. *Proc Natl Acad Sci USA* 103(32): 12109–12114.

**Table S3. Plasmids used in this study**

| Plasmid  | Characteristics                                                   | Antibiotic resistance | Source or reference              |
|----------|-------------------------------------------------------------------|-----------------------|----------------------------------|
| 8S15-I10 | Tn5 transposon insertion in <i>crm</i>                            | Km                    | Holtman et al. 2005 <sup>1</sup> |
| pAM1303  | Promoter-less NSI vector                                          | Sp, Sm                | Laboratory collection            |
| pAM2224  | <i>psbAI</i> :: <i>luc</i> promoter fusion                        | Sp, Sm                | Laboratory collection            |
| pAM2225  | <i>purF</i> :: <i>luc</i> promoter fusion                         | Sp, Sm                | Laboratory collection            |
| pAM4420  | Km <sup>R</sup> cassette insertion in <i>rpaA</i>                 | Km                    | This study                       |
| pAM4226  | WT <i>rpaA</i>                                                    | Sp, Sm                | Laboratory collection            |
| pAM4664  | pSyn1_D/TOPO vector                                               | Sp, Sm                | Life Technologies                |
| pSyn2.0  | pSyn2_D/TOPO vector; <i>psbAI</i> promoter                        | Sp, Sm                | Life Technologies                |
| pAM4666  | Genomic region containing antisense RNA in<br>pSyn1_D/TOPO vector | Sp, Sm                | This study                       |

- Holtman CK, et al. (2005) High-throughput functional analysis of the *Synechococcus elongatus* PCC 7942 genome. *DNA Res* 12(2):103–115.
